# Supplementary material for: Potential Use ofC60/2-Hydroxypropyl-β-cyclodextrin Nanoparticles as a New Photosensitizer in the Treatment of Cancer
Source: Hindawi journal article supplement (doi:10.1155/2014/570506), 2014-01-01
Supplement: f1 [file 570506.f1.docx]

Supplementary Figure 1S. Absorption Spectra (a) of C60/HP--CyD Nanoparticles and PpIX, and Light Source Spectrum (b)

Concentration of these photosensitizers was 0.05 mM.
